# Supplementary material
Source: PubMed Central journal article supplement (PMC3944069)

## **Legend supplementary figures**

### **Figure S1: no differences in T cell population after BCG vaccination.**

Histograms show the expression level of CD4, CD8 or both receptors as percentage of total cells (**A, C, E**) and within the CD3+ population (**B, D, F**) isolated from 18 volunteers before and after BCG vaccination.

**Figure S2:** Flow cytometry analysis of peripheral blood cells of one volunteer as example of the gating strategy forward scatter against side scatter and CD14 against CD16 positive cells.

### **Figure S3: BCG alters the phenotype of circulating monocytes in healthy volunteers.**

Flow cytometry analysis of surface markers within CD14+ cells isolated from 1 volunteer before and 1 year after BCG vaccination, activation markers CD14+ (**A**) and CD11b (**B**), Toll like receptors TLR4 (**C**) and TLR2 (**D**), and C-type lectin receptors Mannose receptor (MR) (**E**) and Dectin-1 (**F**).

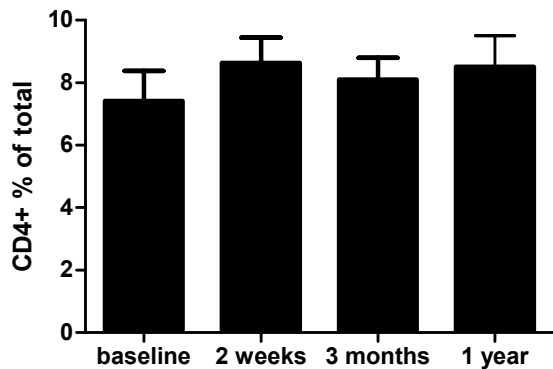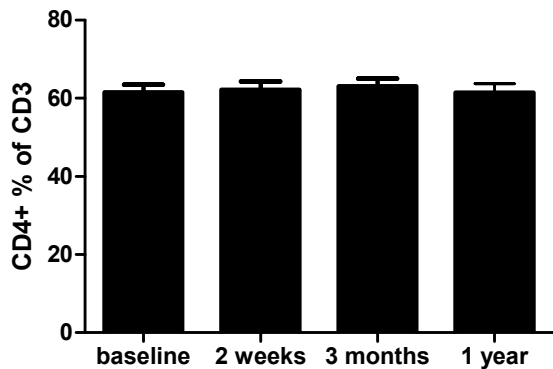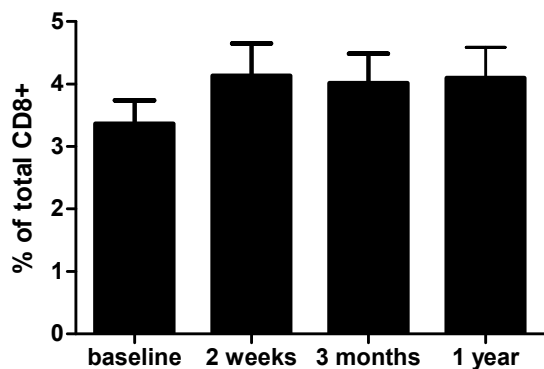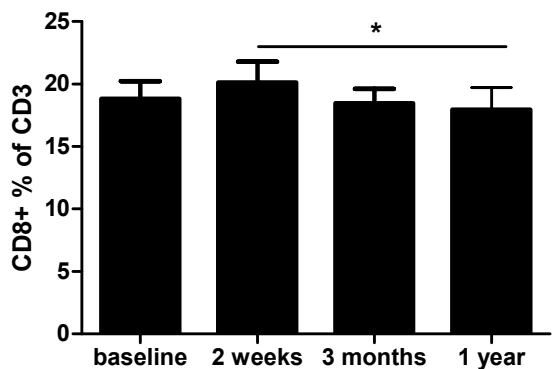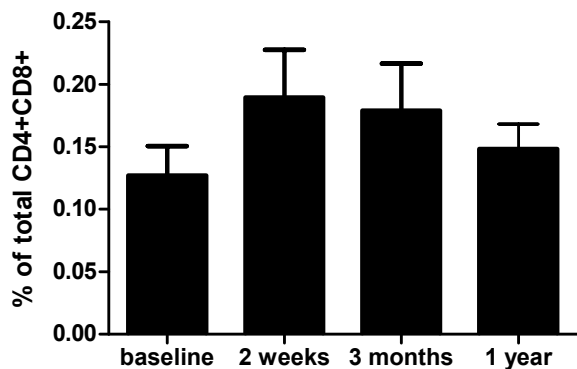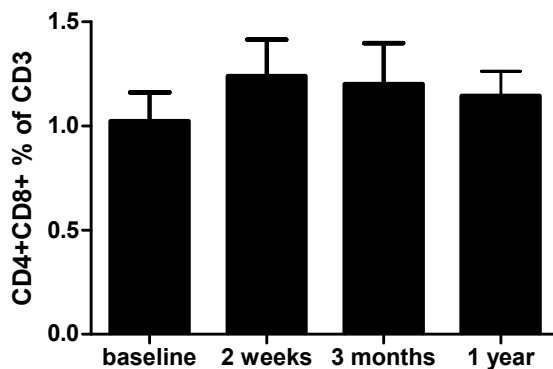

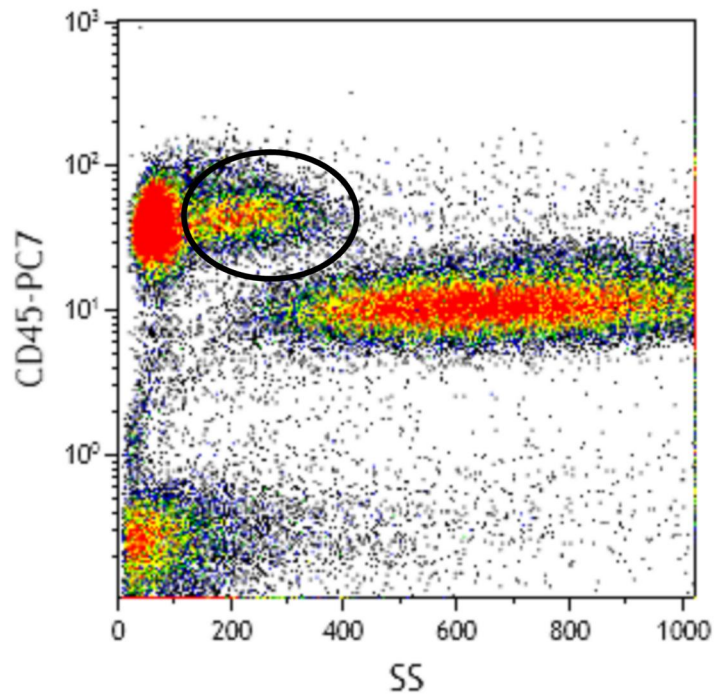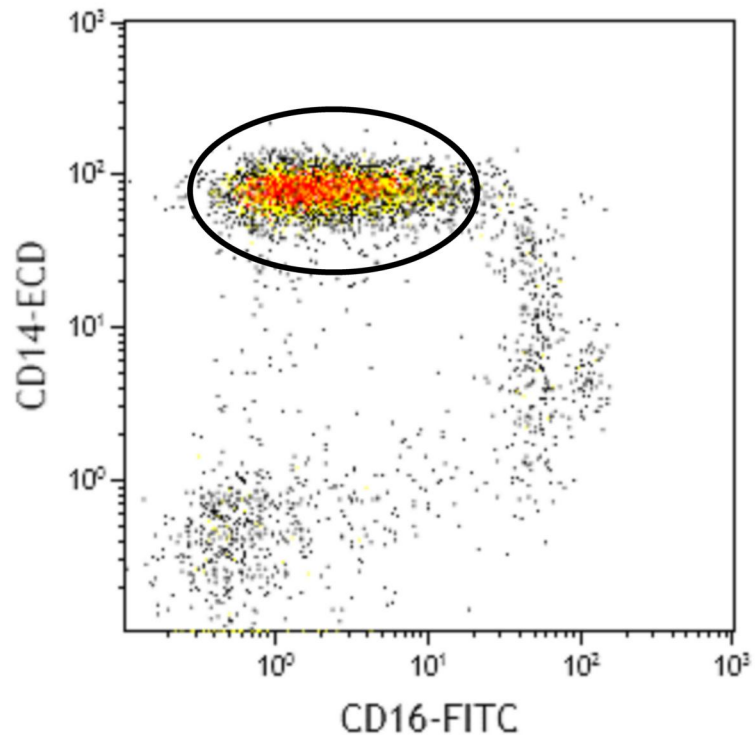

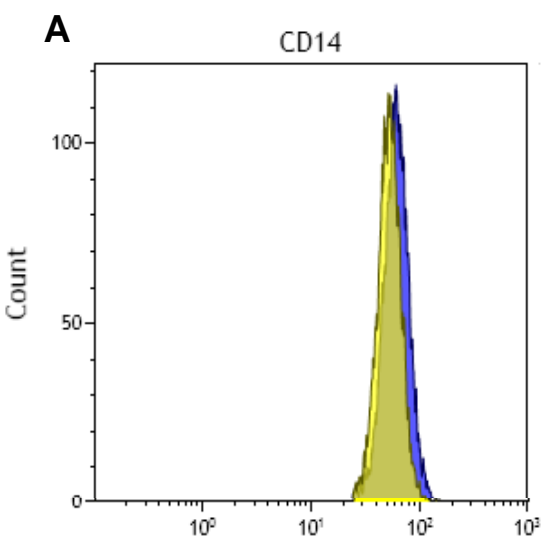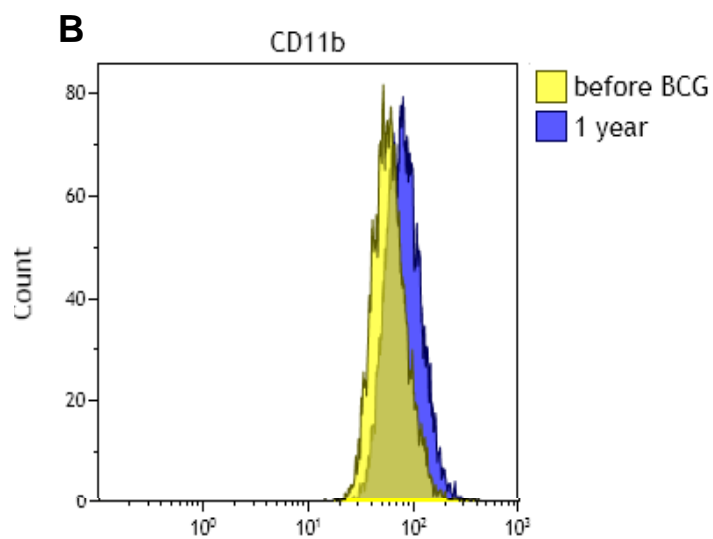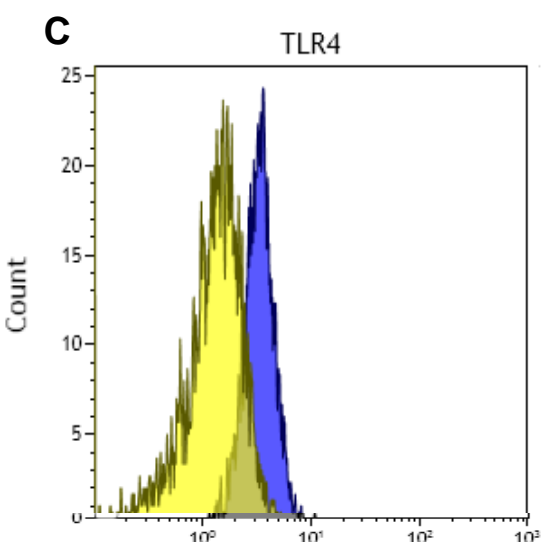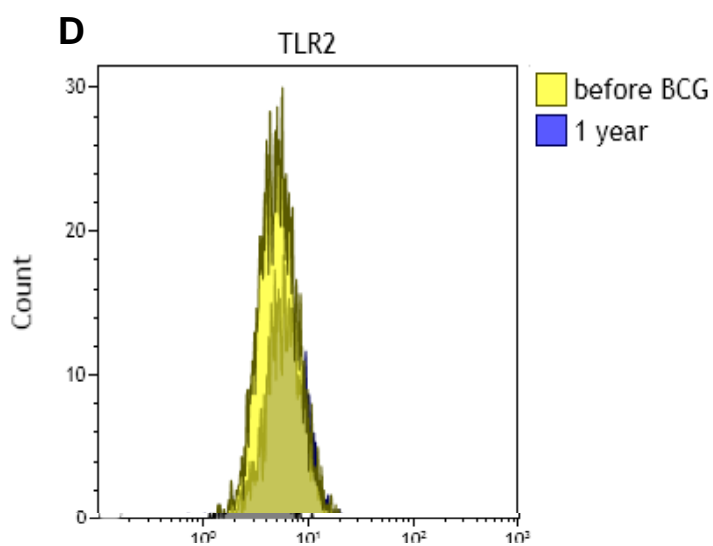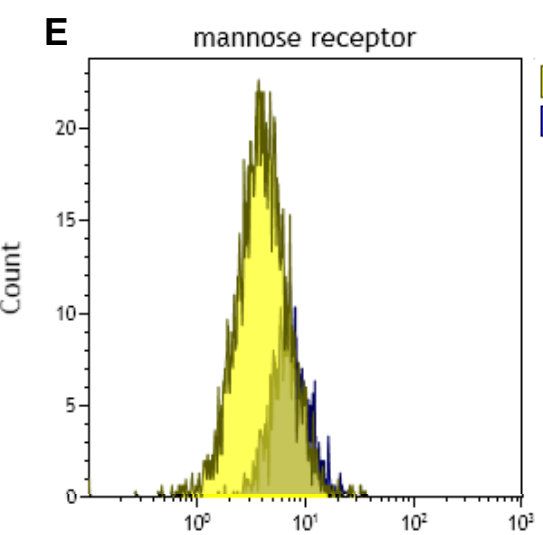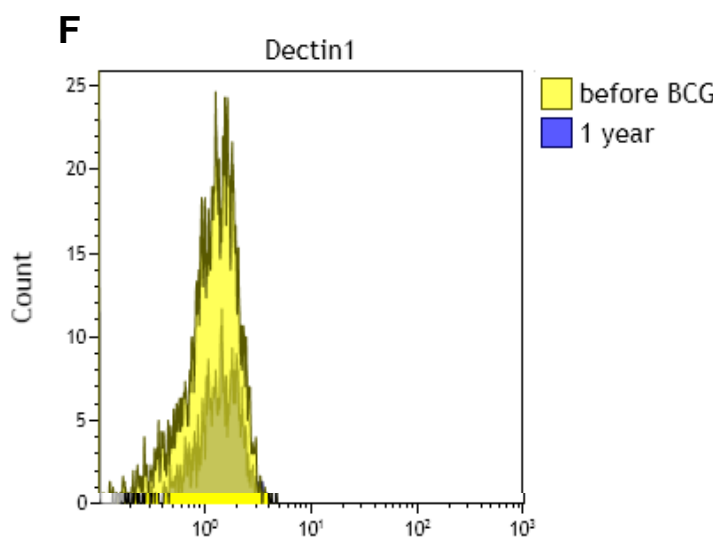

Supplement: NIHMS539676-supplement-supplement_1.pdf [file NIHMS539676-supplement-supplement_1.pdf]
